# Supplementary material
Source: publisher figshare collection journal article supplement (https://acs.figshare.com/ndownloader/files/3875260)
Supplement: Supplementary file 1 [file 3875260]

 
data_y-4-revised
 
_audit_creation_method            SHELXL-97
_chemical_name_systematic
;
 ?
;
_chemical_name_common             ?
_chemical_melting_point           ?
_chemical_formula_moiety          ?
_chemical_formula_sum
 'C20 H19 Cl3 N4 O13'
_chemical_formula_weight          629.74
 
loop_
 _atom_type_symbol
 _atom_type_description
 _atom_type_scat_dispersion_real
 _atom_type_scat_dispersion_imag
 _atom_type_scat_source
 'C'  'C'   0.0033   0.0016
 'International Tables Vol C Tables 4.2.6.8 and 6.1.1.4'
 'H'  'H'   0.0000   0.0000
 'International Tables Vol C Tables 4.2.6.8 and 6.1.1.4'
 'N'  'N'   0.0061   0.0033
 'International Tables Vol C Tables 4.2.6.8 and 6.1.1.4'
 'O'  'O'   0.0106   0.0060
 'International Tables Vol C Tables 4.2.6.8 and 6.1.1.4'
 'Cl'  'Cl'   0.1484   0.1585
 'International Tables Vol C Tables 4.2.6.8 and 6.1.1.4'
 
_symmetry_cell_setting            'monoclinic'
_symmetry_space_group_name_H-M    'P21/c'
 
loop_
 _symmetry_equiv_pos_as_xyz
 'x, y, z'
 '-x, y+1/2, -z+1/2'
 '-x, -y, -z'
 'x, -y-1/2, z-1/2'
 
_cell_length_a                    8.3263(8)
_cell_length_b                    12.0421(11)
_cell_length_c                    24.7248(19)
_cell_angle_alpha                 90.00
_cell_angle_beta                  100.397(3)
_cell_angle_gamma                 90.00
_cell_volume                      2438.4(4)
_cell_formula_units_Z             4
_cell_measurement_temperature     150(2)
_cell_measurement_reflns_used     4200
_cell_measurement_theta_min       1.6
_cell_measurement_theta_max       31.8
 
_exptl_crystal_description        block
_exptl_crystal_colour             colourless
_exptl_crystal_size_max           0.23
_exptl_crystal_size_mid           0.17
_exptl_crystal_size_min           0.09
_exptl_crystal_density_meas       ?
_exptl_crystal_density_diffrn     1.715
_exptl_crystal_density_method     'not measured'
_exptl_crystal_F_000              1288
_exptl_absorpt_coefficient_mu     0.456
_exptl_absorpt_correction_type    multi-scan
_exptl_absorpt_correction_T_min   0.91
_exptl_absorpt_correction_T_max   0.96
_exptl_absorpt_process_details    SADABS
 
_exptl_special_details
;
 ?
;
 
_diffrn_ambient_temperature       150(2)
_diffrn_radiation_wavelength      0.71073
_diffrn_radiation_type            MoK\a
_diffrn_radiation_source          'fine-focus sealed tube'
_diffrn_radiation_monochromator   graphite
_diffrn_measurement_device_type   'BRUKER SMART APEX II CCD AREA DETECTOR'
_diffrn_measurement_method        'OMEGA SCAN'
_diffrn_detector_area_resol_mean  ?
_diffrn_standards_number          ?
_diffrn_standards_interval_count  ?
_diffrn_standards_interval_time   ?
_diffrn_standards_decay_%         ?
_diffrn_reflns_number             27692
_diffrn_reflns_av_R_equivalents   0.0244
_diffrn_reflns_av_sigmaI/netI     0.0218
_diffrn_reflns_limit_h_min        -12
_diffrn_reflns_limit_h_max        12
_diffrn_reflns_limit_k_min        -17
_diffrn_reflns_limit_k_max        15
_diffrn_reflns_limit_l_min        -32
_diffrn_reflns_limit_l_max        30
_diffrn_reflns_theta_min          1.67
_diffrn_reflns_theta_max          31.88
_reflns_number_total              6682
_reflns_number_gt                 5875
_reflns_threshold_expression      >2sigma(I)
 
_computing_data_collection        'BRUKER SMART APEX II'
_computing_cell_refinement        'BRUKER SMART APEX II'
_computing_data_reduction         'BRUKER AXS SAINT'
_computing_structure_solution     'SHELXS-97 (Sheldrick, 1990)'
_computing_structure_refinement   'SHELXL-97 (Sheldrick, 1997)'
_computing_molecular_graphics     
'ORTEP-3 for Windows (Version 1.06) and Platon v1.13'
_computing_publication_material   'SHELXL97 and PARST 95 (Nardelli, 1995)'
 
_refine_special_details
;
 Refinement of F^2^ against ALL reflections.  The weighted R-factor wR and
 goodness of fit S are based on F^2^, conventional R-factors R are based
 on F, with F set to zero for negative F^2^. The threshold expression of
 F^2^ > 2sigma(F^2^) is used only for calculating R-factors(gt) etc. and is
 not relevant to the choice of reflections for refinement.  R-factors based
 on F^2^ are statistically about twice as large as those based on F, and R-
 factors based on ALL data will be even larger.
;
 
_refine_ls_structure_factor_coef  Fsqd
_refine_ls_matrix_type            full
_refine_ls_weighting_scheme       calc
_refine_ls_weighting_details
 'calc w=1/[\s^2^(Fo^2^)+(0.0576P)^2^+3.9888P] where P=(Fo^2^+2Fc^2^)/3'
_atom_sites_solution_primary      direct
_atom_sites_solution_secondary    difmap
_atom_sites_solution_hydrogens    geom
_refine_ls_hydrogen_treatment     constr
_refine_ls_extinction_method      none
_refine_ls_extinction_coef        ?
_refine_ls_number_reflns          6682
_refine_ls_number_parameters      361
_refine_ls_number_restraints      0
_refine_ls_R_factor_all           0.0584
_refine_ls_R_factor_gt            0.0517
_refine_ls_wR_factor_ref          0.1368
_refine_ls_wR_factor_gt           0.1325
_refine_ls_goodness_of_fit_ref    1.075
_refine_ls_restrained_S_all       1.075
_refine_ls_shift/su_max           0.000
_refine_ls_shift/su_mean          0.000
 
loop_
 _atom_site_label
 _atom_site_type_symbol
 _atom_site_fract_x
 _atom_site_fract_y
 _atom_site_fract_z
 _atom_site_U_iso_or_equiv
 _atom_site_adp_type
 _atom_site_occupancy
 _atom_site_symmetry_multiplicity
 _atom_site_calc_flag
 _atom_site_refinement_flags
 _atom_site_disorder_assembly
 _atom_site_disorder_group
C1 C 0.9407(3) 0.89952(17) 0.08981(9) 0.0202(4) Uani 1 1 d . . .
H1 H 1.0075 0.8371 0.0950 0.024 Uiso 1 1 calc R . .
N1 N 0.9222(2) 0.96192(16) 0.13283(8) 0.0228(4) Uani 1 1 d . . .
H1N H 0.9730 0.9429 0.1649 0.027 Uiso 1 1 calc R . .
C2 C 0.8277(3) 1.05303(19) 0.12831(10) 0.0251(5) Uani 1 1 d . . .
H2 H 0.8176 1.0942 0.1593 0.030 Uiso 1 1 calc R . .
C3 C 0.7464(3) 1.08460(18) 0.07751(11) 0.0263(5) Uani 1 1 d . . .
H3 H 0.6808 1.1477 0.0737 0.032 Uiso 1 1 calc R . .
C4 C 0.7625(3) 1.02192(18) 0.03179(10) 0.0221(4) Uani 1 1 d . . .
H4 H 0.7076 1.0430 -0.0028 0.027 Uiso 1 1 calc R . .
C5 C 0.8610(2) 0.92711(16) 0.03743(9) 0.0170(4) Uani 1 1 d . . .
C6 C 0.8847(2) 0.85623(16) -0.00964(9) 0.0175(4) Uani 1 1 d . . .
C7 C 0.8122(3) 0.88175(18) -0.06311(9) 0.0196(4) Uani 1 1 d . . .
H7 H 0.7467 0.9445 -0.0704 0.024 Uiso 1 1 calc R . .
C8 C 0.8382(2) 0.81269(17) -0.10575(9) 0.0192(4) Uani 1 1 d . . .
C9 C 0.9385(3) 0.71989(17) -0.09266(9) 0.0190(4) Uani 1 1 d . . .
H9 H 0.9577 0.6713 -0.1200 0.023 Uiso 1 1 calc R . .
C10 C 1.0094(2) 0.70129(17) -0.03794(9) 0.0176(4) Uani 1 1 d . . .
N2 N 0.9819(2) 0.76765(14) 0.00289(7) 0.0178(3) Uani 1 1 d . . .
C11 C 1.1219(2) 0.60638(17) -0.02136(9) 0.0178(4) Uani 1 1 d . . .
C12 C 1.1572(3) 0.52646(18) -0.05840(9) 0.0211(4) Uani 1 1 d . . .
H12 H 1.1104 0.5318 -0.0954 0.025 Uiso 1 1 calc R . .
C13 C 1.2614(3) 0.43925(19) -0.04031(10) 0.0237(4) Uani 1 1 d . . .
H13 H 1.2837 0.3857 -0.0650 0.028 Uiso 1 1 calc R . .
C14 C 1.3315(3) 0.43220(19) 0.01407(10) 0.0253(5) Uani 1 1 d . . .
H14 H 1.4016 0.3739 0.0267 0.030 Uiso 1 1 calc R . .
N3 N 1.2973(3) 0.51135(18) 0.04915(8) 0.0271(4) Uani 1 1 d . . .
H3N H 1.3427 0.5067 0.0832 0.033 Uiso 1 1 calc R . .
C15 C 1.1964(3) 0.59634(19) 0.03351(9) 0.0228(4) Uani 1 1 d . . .
H15 H 1.1760 0.6485 0.0592 0.027 Uiso 1 1 calc R . .
C16 C 0.7615(3) 0.83774(18) -0.16363(9) 0.0211(4) Uani 1 1 d . . .
C17 C 0.6363(3) 0.9162(2) -0.17575(11) 0.0293(5) Uani 1 1 d . . .
H17 H 0.6021 0.9555 -0.1475 0.035 Uiso 1 1 calc R . .
C18 C 0.5642(3) 0.9351(2) -0.22927(11) 0.0336(5) Uani 1 1 d . . .
H18 H 0.4815 0.9877 -0.2373 0.040 Uiso 1 1 calc R . .
N4 N 0.6121(3) 0.8785(2) -0.26978(9) 0.0347(5) Uani 1 1 d . . .
H4N H 0.5634 0.8898 -0.3031 0.042 Uiso 1 1 calc R . .
C19 C 0.7332(4) 0.8049(3) -0.26028(11) 0.0399(6) Uani 1 1 d . . .
H19 H 0.7651 0.7675 -0.2895 0.048 Uiso 1 1 calc R . .
C20 C 0.8111(3) 0.7840(2) -0.20755(10) 0.0337(6) Uani 1 1 d . . .
H20 H 0.8973 0.7338 -0.2012 0.040 Uiso 1 1 calc R . .
Cl1 Cl 0.39934(6) 0.84488(4) 0.34634(2) 0.01843(12) Uani 1 1 d . . .
O1 O 0.4209(2) 0.96060(13) 0.36263(7) 0.0289(4) Uani 1 1 d . . .
O2 O 0.2304(2) 0.81394(15) 0.34263(8) 0.0291(4) Uani 1 1 d . . .
O3 O 0.4980(2) 0.77793(15) 0.38803(7) 0.0274(4) Uani 1 1 d . . .
O4 O 0.4490(2) 0.82909(16) 0.29426(7) 0.0325(4) Uani 1 1 d . . .
Cl2 Cl 0.48273(6) 0.80255(4) 0.09693(2) 0.02476(13) Uani 1 1 d . . .
O5 O 0.4927(3) 0.69045(15) 0.11701(8) 0.0413(5) Uani 1 1 d . . .
O6 O 0.5214(3) 0.8038(2) 0.04264(9) 0.0496(6) Uani 1 1 d . . .
O7 O 0.5942(3) 0.87111(18) 0.13383(11) 0.0482(6) Uani 1 1 d . . .
O8 O 0.3197(2) 0.84470(19) 0.09423(9) 0.0422(5) Uani 1 1 d . . .
Cl3 Cl 0.12045(7) 0.58733(5) 0.18679(2) 0.02593(13) Uani 1 1 d . . .
O9 O 0.1737(3) 0.6356(2) 0.23896(9) 0.0560(6) Uani 1 1 d . . .
O10 O 0.0448(4) 0.6666(2) 0.14742(10) 0.0576(7) Uani 1 1 d . . .
O11 O 0.2533(4) 0.5346(3) 0.16768(10) 0.0732(9) Uani 1 1 d . . .
O12 O 0.0039(5) 0.5017(3) 0.18869(12) 0.0912(13) Uani 1 1 d . . .
O1W O 1.0846(4) 0.8843(2) 0.22648(9) 0.0694(9) Uani 1 1 d . . .
H2W H 1.0792 0.9180 0.2586 0.104 Uiso 1 1 d R . .
H1W H 1.1585 0.8392 0.2283 0.104 Uiso 1 1 d R . .
 
loop_
 _atom_site_aniso_label
 _atom_site_aniso_U_11
 _atom_site_aniso_U_22
 _atom_site_aniso_U_33
 _atom_site_aniso_U_23
 _atom_site_aniso_U_13
 _atom_site_aniso_U_12
C1 0.0197(10) 0.0195(9) 0.0207(10) 0.0019(8) 0.0019(8) -0.0004(7)
N1 0.0238(9) 0.0253(9) 0.0190(9) -0.0008(7) 0.0027(7) -0.0032(7)
C2 0.0280(11) 0.0222(9) 0.0272(12) -0.0066(9) 0.0108(9) -0.0050(8)
C3 0.0252(11) 0.0189(9) 0.0361(13) -0.0002(9) 0.0093(9) 0.0025(8)
C4 0.0206(10) 0.0203(9) 0.0245(11) 0.0048(8) 0.0017(8) 0.0020(8)
C5 0.0160(9) 0.0166(8) 0.0180(10) 0.0012(7) 0.0024(7) -0.0014(7)
C6 0.0154(9) 0.0177(8) 0.0192(10) -0.0001(7) 0.0029(7) -0.0028(7)
C7 0.0160(9) 0.0209(9) 0.0216(10) 0.0007(8) 0.0023(8) -0.0012(7)
C8 0.0159(9) 0.0213(9) 0.0202(10) 0.0011(8) 0.0021(7) -0.0036(7)
C9 0.0186(9) 0.0196(9) 0.0188(10) -0.0012(7) 0.0033(8) -0.0032(7)
C10 0.0163(9) 0.0188(8) 0.0176(10) -0.0003(7) 0.0030(7) -0.0050(7)
N2 0.0165(8) 0.0186(7) 0.0181(8) -0.0003(6) 0.0022(6) -0.0025(6)
C11 0.0157(9) 0.0196(9) 0.0176(10) 0.0014(7) 0.0018(7) -0.0042(7)
C12 0.0221(10) 0.0231(9) 0.0177(10) 0.0012(8) 0.0029(8) -0.0008(8)
C13 0.0232(10) 0.0234(10) 0.0249(11) -0.0001(8) 0.0053(8) 0.0013(8)
C14 0.0195(10) 0.0240(10) 0.0316(12) 0.0084(9) 0.0026(9) 0.0004(8)
N3 0.0264(10) 0.0322(10) 0.0202(9) 0.0023(8) -0.0026(7) -0.0017(8)
C15 0.0247(11) 0.0249(10) 0.0178(10) -0.0006(8) 0.0012(8) -0.0026(8)
C16 0.0186(10) 0.0226(9) 0.0215(11) 0.0027(8) 0.0017(8) -0.0049(8)
C17 0.0317(12) 0.0245(10) 0.0303(13) 0.0017(9) 0.0014(10) 0.0013(9)
C18 0.0313(13) 0.0296(12) 0.0361(14) 0.0087(11) -0.0039(10) 0.0003(10)
N4 0.0326(11) 0.0445(13) 0.0235(10) 0.0113(9) -0.0044(8) -0.0035(10)
C19 0.0413(15) 0.0575(18) 0.0194(12) 0.0020(12) 0.0018(10) 0.0082(13)
C20 0.0321(13) 0.0463(15) 0.0217(12) 0.0020(11) 0.0022(10) 0.0109(11)
Cl1 0.0206(2) 0.0178(2) 0.0165(2) -0.00004(17) 0.00238(17) 0.00117(17)
O1 0.0407(10) 0.0170(7) 0.0302(9) -0.0009(6) 0.0100(7) -0.0014(7)
O2 0.0194(8) 0.0340(9) 0.0326(9) -0.0004(7) 0.0011(7) -0.0003(7)
O3 0.0263(8) 0.0276(8) 0.0261(9) 0.0053(7) -0.0016(7) 0.0040(7)
O4 0.0446(11) 0.0337(9) 0.0219(9) -0.0020(7) 0.0134(7) 0.0029(8)
Cl2 0.0195(2) 0.0196(2) 0.0339(3) 0.0034(2) 0.0013(2) -0.00113(18)
O5 0.0631(14) 0.0196(8) 0.0344(10) 0.0044(7) -0.0093(9) -0.0005(8)
O6 0.0548(14) 0.0554(14) 0.0418(12) 0.0128(10) 0.0176(10) 0.0127(11)
O7 0.0343(11) 0.0367(11) 0.0689(15) -0.0074(11) -0.0033(10) -0.0134(9)
O8 0.0265(10) 0.0467(12) 0.0527(13) 0.0023(10) 0.0051(9) 0.0076(8)
Cl3 0.0280(3) 0.0295(3) 0.0196(3) -0.0005(2) 0.0025(2) -0.0071(2)
O9 0.0588(15) 0.0695(16) 0.0341(12) -0.0220(11) -0.0065(10) 0.0039(12)
O10 0.091(2) 0.0419(12) 0.0369(12) 0.0070(10) 0.0035(12) 0.0189(13)
O11 0.0787(19) 0.107(2) 0.0344(13) -0.0073(14) 0.0111(12) 0.0470(18)
O12 0.112(3) 0.111(3) 0.0479(15) 0.0124(16) 0.0049(16) -0.081(2)
O1W 0.101(2) 0.0766(18) 0.0217(10) -0.0072(11) -0.0125(12) 0.0514(17)
 
_geom_special_details
;
 All esds (except the esd in the dihedral angle between two l.s. planes)
 are estimated using the full covariance matrix.  The cell esds are taken
 into account individually in the estimation of esds in distances, angles
 and torsion angles; correlations between esds in cell parameters are only
 used when they are defined by crystal symmetry.  An approximate (isotropic)
 treatment of cell esds is used for estimating esds involving l.s. planes.
;
 
loop_
 _geom_bond_atom_site_label_1
 _geom_bond_atom_site_label_2
 _geom_bond_distance
 _geom_bond_site_symmetry_2
 _geom_bond_publ_flag
C1 N1 1.334(3) . ?
C1 C5 1.385(3) . ?
C1 H1 0.9300 . ?
N1 C2 1.343(3) . ?
N1 H1N 0.8600 . ?
C2 C3 1.369(4) . ?
C2 H2 0.9300 . ?
C3 C4 1.386(3) . ?
C3 H3 0.9300 . ?
C4 C5 1.398(3) . ?
C4 H4 0.9300 . ?
C5 C6 1.485(3) . ?
C6 N2 1.341(3) . ?
C6 C7 1.385(3) . ?
C7 C8 1.390(3) . ?
C7 H7 0.9300 . ?
C8 C9 1.398(3) . ?
C8 C16 1.489(3) . ?
C9 C10 1.393(3) . ?
C9 H9 0.9300 . ?
C10 N2 1.339(3) . ?
C10 C11 1.488(3) . ?
C11 C15 1.391(3) . ?
C11 C12 1.396(3) . ?
C12 C13 1.384(3) . ?
C12 H12 0.9300 . ?
C13 C14 1.368(3) . ?
C13 H13 0.9300 . ?
C14 N3 1.353(3) . ?
C14 H14 0.9300 . ?
N3 C15 1.336(3) . ?
N3 H3N 0.8600 . ?
C15 H15 0.9300 . ?
C16 C20 1.389(3) . ?
C16 C17 1.399(3) . ?
C17 C18 1.370(4) . ?
C17 H17 0.9300 . ?
C18 N4 1.331(4) . ?
C18 H18 0.9300 . ?
N4 C19 1.331(4) . ?
N4 H4N 0.8600 . ?
C19 C20 1.371(4) . ?
C19 H19 0.9300 . ?
C20 H20 0.9300 . ?
Cl1 O4 1.4343(17) . ?
Cl1 O2 1.4421(17) . ?
Cl1 O3 1.4430(17) . ?
Cl1 O1 1.4527(17) . ?
Cl2 O5 1.4355(18) . ?
Cl2 O6 1.436(2) . ?
Cl2 O7 1.439(2) . ?
Cl2 O8 1.440(2) . ?
Cl3 O9 1.411(2) . ?
Cl3 O12 1.422(3) . ?
Cl3 O10 1.427(2) . ?
Cl3 O11 1.427(3) . ?
O1W H2W 0.9010 . ?
O1W H1W 0.8159 . ?
 
loop_
 _geom_angle_atom_site_label_1
 _geom_angle_atom_site_label_2
 _geom_angle_atom_site_label_3
 _geom_angle
 _geom_angle_site_symmetry_1
 _geom_angle_site_symmetry_3
 _geom_angle_publ_flag
N1 C1 C5 120.4(2) . . ?
N1 C1 H1 119.8 . . ?
C5 C1 H1 119.8 . . ?
C1 N1 C2 123.0(2) . . ?
C1 N1 H1N 118.5 . . ?
C2 N1 H1N 118.5 . . ?
N1 C2 C3 119.3(2) . . ?
N1 C2 H2 120.4 . . ?
C3 C2 H2 120.4 . . ?
C2 C3 C4 119.5(2) . . ?
C2 C3 H3 120.2 . . ?
C4 C3 H3 120.2 . . ?
C3 C4 C5 120.3(2) . . ?
C3 C4 H4 119.8 . . ?
C5 C4 H4 119.8 . . ?
C1 C5 C4 117.55(19) . . ?
C1 C5 C6 119.09(18) . . ?
C4 C5 C6 123.35(19) . . ?
N2 C6 C7 122.55(19) . . ?
N2 C6 C5 115.85(18) . . ?
C7 C6 C5 121.60(19) . . ?
C6 C7 C8 119.4(2) . . ?
C6 C7 H7 120.3 . . ?
C8 C7 H7 120.3 . . ?
C7 C8 C9 118.1(2) . . ?
C7 C8 C16 120.6(2) . . ?
C9 C8 C16 121.3(2) . . ?
C10 C9 C8 118.96(19) . . ?
C10 C9 H9 120.5 . . ?
C8 C9 H9 120.5 . . ?
N2 C10 C9 122.41(19) . . ?
N2 C10 C11 115.82(18) . . ?
C9 C10 C11 121.77(19) . . ?
C10 N2 C6 118.59(19) . . ?
C15 C11 C12 118.1(2) . . ?
C15 C11 C10 118.88(19) . . ?
C12 C11 C10 123.05(19) . . ?
C13 C12 C11 120.3(2) . . ?
C13 C12 H12 119.8 . . ?
C11 C12 H12 119.8 . . ?
C14 C13 C12 119.7(2) . . ?
C14 C13 H13 120.1 . . ?
C12 C13 H13 120.1 . . ?
N3 C14 C13 119.0(2) . . ?
N3 C14 H14 120.5 . . ?
C13 C14 H14 120.5 . . ?
C15 N3 C14 123.2(2) . . ?
C15 N3 H3N 118.4 . . ?
C14 N3 H3N 118.4 . . ?
N3 C15 C11 119.7(2) . . ?
N3 C15 H15 120.2 . . ?
C11 C15 H15 120.2 . . ?
C20 C16 C17 117.5(2) . . ?
C20 C16 C8 121.4(2) . . ?
C17 C16 C8 121.1(2) . . ?
C18 C17 C16 120.0(2) . . ?
C18 C17 H17 120.0 . . ?
C16 C17 H17 120.0 . . ?
N4 C18 C17 120.2(2) . . ?
N4 C18 H18 119.9 . . ?
C17 C18 H18 119.9 . . ?
C18 N4 C19 121.9(2) . . ?
C18 N4 H4N 119.0 . . ?
C19 N4 H4N 119.0 . . ?
N4 C19 C20 120.2(3) . . ?
N4 C19 H19 119.9 . . ?
C20 C19 H19 119.9 . . ?
C19 C20 C16 120.1(3) . . ?
C19 C20 H20 119.9 . . ?
C16 C20 H20 119.9 . . ?
O4 Cl1 O2 110.18(11) . . ?
O4 Cl1 O3 110.36(11) . . ?
O2 Cl1 O3 108.91(11) . . ?
O4 Cl1 O1 109.56(11) . . ?
O2 Cl1 O1 109.61(11) . . ?
O3 Cl1 O1 108.18(11) . . ?
O5 Cl2 O6 108.93(14) . . ?
O5 Cl2 O7 109.27(13) . . ?
O6 Cl2 O7 111.03(15) . . ?
O5 Cl2 O8 110.04(14) . . ?
O6 Cl2 O8 108.77(14) . . ?
O7 Cl2 O8 108.79(14) . . ?
O9 Cl3 O12 111.83(18) . . ?
O9 Cl3 O10 112.05(16) . . ?
O12 Cl3 O10 106.7(2) . . ?
O9 Cl3 O11 110.55(16) . . ?
O12 Cl3 O11 105.2(2) . . ?
O10 Cl3 O11 110.17(17) . . ?
H2W O1W H1W 114.0 . . ?
 
loop_
 _geom_torsion_atom_site_label_1
 _geom_torsion_atom_site_label_2
 _geom_torsion_atom_site_label_3
 _geom_torsion_atom_site_label_4
 _geom_torsion
 _geom_torsion_site_symmetry_1
 _geom_torsion_site_symmetry_2
 _geom_torsion_site_symmetry_3
 _geom_torsion_site_symmetry_4
 _geom_torsion_publ_flag
C5 C1 N1 C2 0.0(3) . . . . ?
C1 N1 C2 C3 -0.3(3) . . . . ?
N1 C2 C3 C4 0.2(3) . . . . ?
C2 C3 C4 C5 0.0(3) . . . . ?
N1 C1 C5 C4 0.2(3) . . . . ?
N1 C1 C5 C6 179.75(18) . . . . ?
C3 C4 C5 C1 -0.2(3) . . . . ?
C3 C4 C5 C6 -179.7(2) . . . . ?
C1 C5 C6 N2 1.1(3) . . . . ?
C4 C5 C6 N2 -179.39(19) . . . . ?
C1 C5 C6 C7 -177.96(19) . . . . ?
C4 C5 C6 C7 1.5(3) . . . . ?
N2 C6 C7 C8 1.0(3) . . . . ?
C5 C6 C7 C8 179.98(18) . . . . ?
C6 C7 C8 C9 -0.4(3) . . . . ?
C6 C7 C8 C16 179.81(18) . . . . ?
C7 C8 C9 C10 -0.8(3) . . . . ?
C16 C8 C9 C10 178.96(18) . . . . ?
C8 C9 C10 N2 1.6(3) . . . . ?
C8 C9 C10 C11 -177.86(18) . . . . ?
C9 C10 N2 C6 -1.2(3) . . . . ?
C11 C10 N2 C6 178.38(17) . . . . ?
C7 C6 N2 C10 -0.2(3) . . . . ?
C5 C6 N2 C10 -179.24(17) . . . . ?
N2 C10 C11 C15 -3.4(3) . . . . ?
C9 C10 C11 C15 176.14(19) . . . . ?
N2 C10 C11 C12 176.79(19) . . . . ?
C9 C10 C11 C12 -3.7(3) . . . . ?
C15 C11 C12 C13 1.0(3) . . . . ?
C10 C11 C12 C13 -179.18(19) . . . . ?
C11 C12 C13 C14 -0.7(3) . . . . ?
C12 C13 C14 N3 -0.1(3) . . . . ?
C13 C14 N3 C15 0.7(3) . . . . ?
C14 N3 C15 C11 -0.4(3) . . . . ?
C12 C11 C15 N3 -0.4(3) . . . . ?
C10 C11 C15 N3 179.74(19) . . . . ?
C7 C8 C16 C20 166.8(2) . . . . ?
C9 C8 C16 C20 -13.0(3) . . . . ?
C7 C8 C16 C17 -13.4(3) . . . . ?
C9 C8 C16 C17 166.8(2) . . . . ?
C20 C16 C17 C18 1.9(4) . . . . ?
C8 C16 C17 C18 -177.9(2) . . . . ?
C16 C17 C18 N4 0.5(4) . . . . ?
C17 C18 N4 C19 -2.0(4) . . . . ?
C18 N4 C19 C20 1.1(5) . . . . ?
N4 C19 C20 C16 1.5(5) . . . . ?
C17 C16 C20 C19 -2.9(4) . . . . ?
C8 C16 C20 C19 176.9(3) . . . . ?
 
loop_
 _geom_hbond_atom_site_label_D
 _geom_hbond_atom_site_label_H
 _geom_hbond_atom_site_label_A
 _geom_hbond_distance_DH
 _geom_hbond_distance_HA
 _geom_hbond_distance_DA
 _geom_hbond_angle_DHA
 _geom_hbond_site_symmetry_A
N1 H1N O1W  0.86 1.78 2.633(3) 171.2 .
O1W H1W O9  0.82 2.47 3.088(4) 133.7 1_655
O1W H2W O12  0.90 1.88 2.738(4) 159.8 2_655
N3 H3N O11  0.86 2.36 3.031(3) 134.6 1_655
N3 H3N O1  0.86 2.24 2.965(3) 141.7 2_745
N4 H4N O1  0.86 2.35 2.978(3) 130.7 3_675
N4 H4N O5  0.86 2.18 2.917(3) 143.1 4_575
C1 H1 O10  0.93 2.42 3.194(3) 140.9 1_655
C2 H2 O9  0.93 2.55 3.431(3) 157.9 2_655
C3 H3 O3  0.93 2.47 3.303(3) 149.8 2_655
C12 H12 O12  0.93 2.37 3.276(4) 166.2 3_665
C14 H14 O3  0.93 2.42 3.176(3) 138.7 2_745
C1 H1 N2  0.93 2.40 2.743(3) 101.6 .
C15 H15 N2  0.93 2.41 2.744(3) 101.2 .
 
_diffrn_measured_fraction_theta_max    0.796
_diffrn_reflns_theta_full              31.88
_diffrn_measured_fraction_theta_full   0.796
_refine_diff_density_max    0.948
_refine_diff_density_min   -0.623
_refine_diff_density_rms    0.080
